# Supplementary material
Source: PubMed Central journal article supplement (PMC3911210)
Supplement: AEM.03130-13_zam999105095so1.pdf [file AEM.03130-13_zam999105095so1.pdf]

**A**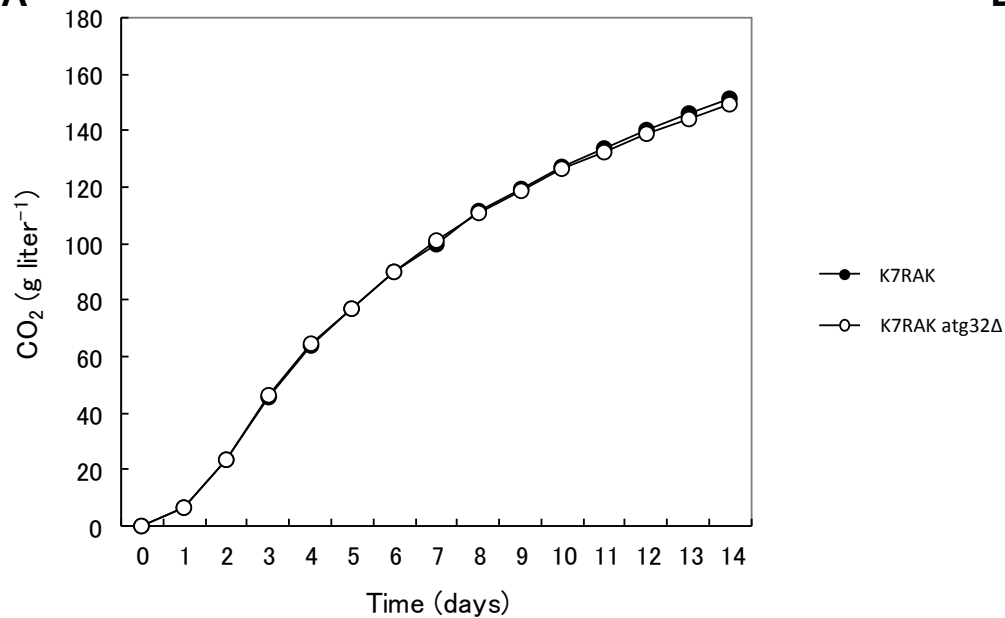**B**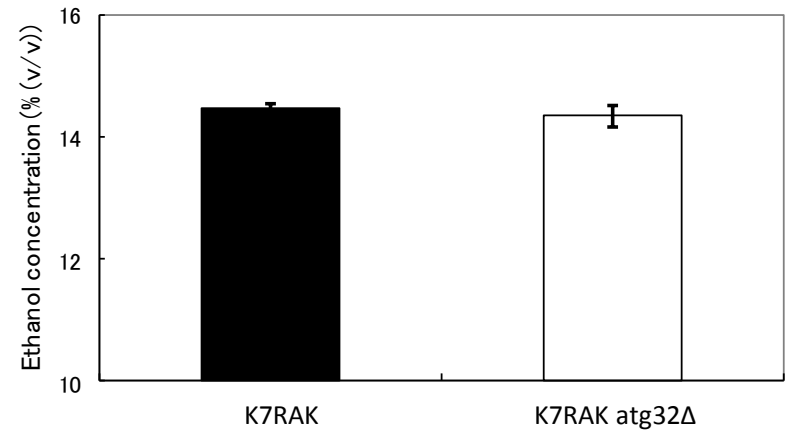

**Supplementary Fig. S1. Fermentation profiles of *atg32Δ* strain and its parent diploid sake yeast during the production of normal sake.**

(A) CO<sub>2</sub> evolution during sake brewing. The results are expressed as the weight loss of the mash, which represents the weight of CO<sub>2</sub>. (B) Final ethanol concentration (% (v/v)). Closed black and open symbols or boxes represent the results for sake diploid yeast K7RAK and K7RAK *atg32Δ* strains, respectively. The results are expressed as the mean  $\pm$  SEM of three independent brewing experiments initiated with respective starter cultures ( $n = 3$ ; \*:  $p < 0.05$ , unpaired one-tailed Student's *t*-test).

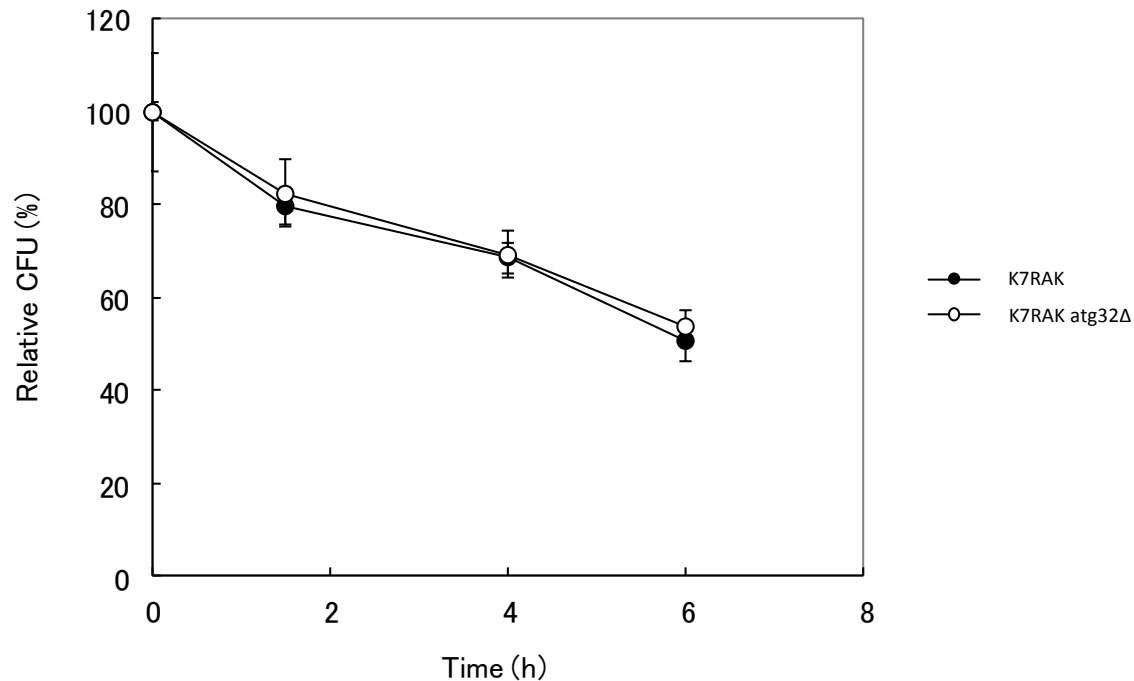

**Supplementary Fig. S2. Ethanol sensitivity of *atg32Δ* and its parent sake yeast.**

Sake yeast K7RAK and K7RAK *atg32Δ* strains were incubated statically in minimal synthetic medium, and cells were collected by centrifugation. Cells ( $1 \times 10^6$  cells) were washed once with sterile water, and dissolved in 1 ml solution containing 15% (v/v) ethanol and 67 mM  $\text{KH}_2\text{PO}_4$  (pH 4.5). The solution was placed at 30°C statically. A small aliquot of the solution was recovered after homogenization at 0, 1.5, 4, 6 h from the start, diluted in sterile water and plated on YPD plates. The plates were incubated at 30°C for 2 d and formed colonies were counted. Open symbols represent the results of K7RAK and closed symbols represent those of K7RAK *atg32Δ*. The results are mean  $\pm$  SEM of three independent ethanol exposure experiments cultures ( $n = 3$ ; \*:  $p < 0.05$ , unpaired one-tailed Student's *t*-test).
